# Supplementary material for: Impact of the first COVID-19 lockdown on the relationship with parents and peers in a cohort of adolescents with somatic symptom disorder
Source: Springer Nature journal article supplement (doi:10.1186/s13052-022-01300-y), 2022-06-20
Supplement: MOESM2 [file 13052_2022_1300_MOESM2_ESM.pdf]

During the past 4 weeks, how much have you been bothered by any of the following problems?

|                                                                          | Not bothered at all<br>(0) | Bothered a little (1) | Bothered a lot (2) |
|--------------------------------------------------------------------------|----------------------------|-----------------------|--------------------|
| Stomach pain                                                             |                            |                       |                    |
| Back pain                                                                |                            |                       |                    |
| Pain in your arms, legs,<br>or joints (knees, hips,<br>etc.)             |                            |                       |                    |
| Menstrual cramps or<br>other problems with<br>your periods WOMEN<br>ONLY |                            |                       |                    |
| Headaches                                                                |                            |                       |                    |
| Chest pain                                                               |                            |                       |                    |
| Dizziness                                                                |                            |                       |                    |
| Fainting spells                                                          |                            |                       |                    |
| Feeling your heart<br>pound or race                                      |                            |                       |                    |
| Shortness of breath                                                      |                            |                       |                    |
| Constipation, loose<br>bowels, or diarrhea                               |                            |                       |                    |
| Nausea, gas, or<br>indigestion                                           |                            |                       |                    |
| Feeling tired or having<br>low energy                                    |                            |                       |                    |
| Trouble sleeping                                                         |                            |                       |                    |

(For office coding: Total Score T (x) \_\_\_\_\_ = \_\_\_\_\_ + \_\_\_\_\_ ). In females  $y = x (15/14)$ . In males  $y = x (14/13)$

**Supplementary file 2.** Modified PHQ-15 questionnaire

|                                                                              | Not<br>bothered<br>at all<br>(0) | Bothered<br>a<br>little<br>(1) | Bothered<br>a<br>lot<br>(2) |
|------------------------------------------------------------------------------|----------------------------------|--------------------------------|-----------------------------|
| a. Stomach pain                                                              | <input type="checkbox"/>         | <input type="checkbox"/>       | <input type="checkbox"/>    |
| b. Back pain                                                                 | <input type="checkbox"/>         | <input type="checkbox"/>       | <input type="checkbox"/>    |
| c. Pain in your arms, legs, or joints (knees, hips, etc.)                    | <input type="checkbox"/>         | <input type="checkbox"/>       | <input type="checkbox"/>    |
| d. Menstrual cramps or other problems with your periods<br><b>WOMEN ONLY</b> | <input type="checkbox"/>         | <input type="checkbox"/>       | <input type="checkbox"/>    |
| e. Headaches                                                                 | <input type="checkbox"/>         | <input type="checkbox"/>       | <input type="checkbox"/>    |
| f. Chest pain                                                                | <input type="checkbox"/>         | <input type="checkbox"/>       | <input type="checkbox"/>    |
| g. Dizziness                                                                 | <input type="checkbox"/>         | <input type="checkbox"/>       | <input type="checkbox"/>    |
| h. Fainting spells                                                           | <input type="checkbox"/>         | <input type="checkbox"/>       | <input type="checkbox"/>    |
| i. Feeling your heart pound or race                                          | <input type="checkbox"/>         | <input type="checkbox"/>       | <input type="checkbox"/>    |
| j. Shortness of breath                                                       | <input type="checkbox"/>         | <input type="checkbox"/>       | <input type="checkbox"/>    |
| k. Pain or problems during sexual intercourse                                | <input type="checkbox"/>         | <input type="checkbox"/>       | <input type="checkbox"/>    |
| l. Constipation, loose bowels, or diarrhea                                   | <input type="checkbox"/>         | <input type="checkbox"/>       | <input type="checkbox"/>    |
| m. Nausea, gas, or indigestion                                               | <input type="checkbox"/>         | <input type="checkbox"/>       | <input type="checkbox"/>    |
| n. Feeling tired or having low energy                                        | <input type="checkbox"/>         | <input type="checkbox"/>       | <input type="checkbox"/>    |
| o. Trouble sleeping                                                          | <input type="checkbox"/>         | <input type="checkbox"/>       | <input type="checkbox"/>    |
